# Supplementary figures and images for: Genome-wide epigenetic cross-talk between DNA methylation and H3K27me3 in zebrafish embryos
Source: PubMed Central journal article supplement — Genom Data. 2015 Jul 22;6:7–9. doi: 10.1016/j.gdata.2015.07.020 (PMC4664660; doi:10.1016/j.gdata.2015.07.020), 2015-07-22

# Supplementary Figure 1

a

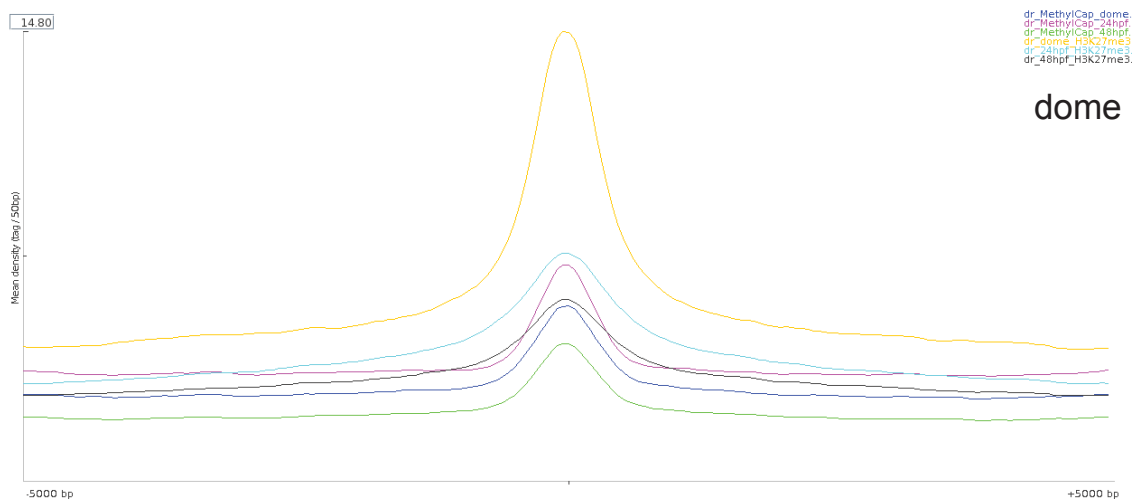

b

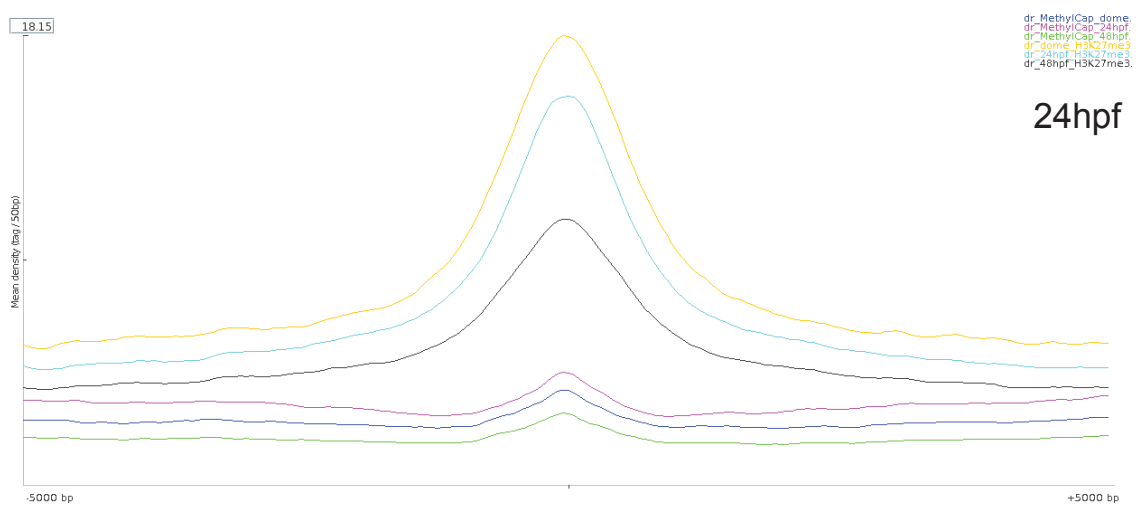

c

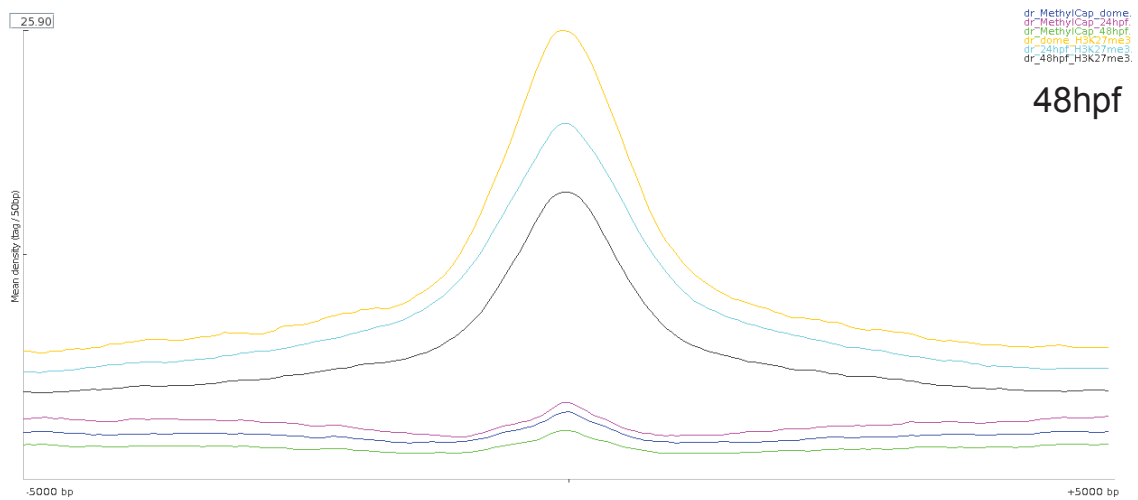

Supplement: mmc1.pdf [file mmc1.pdf]
